March 2011

# PSYCHIATRIC SERVICES

A Journal of the  
American Psychiatric  
Association

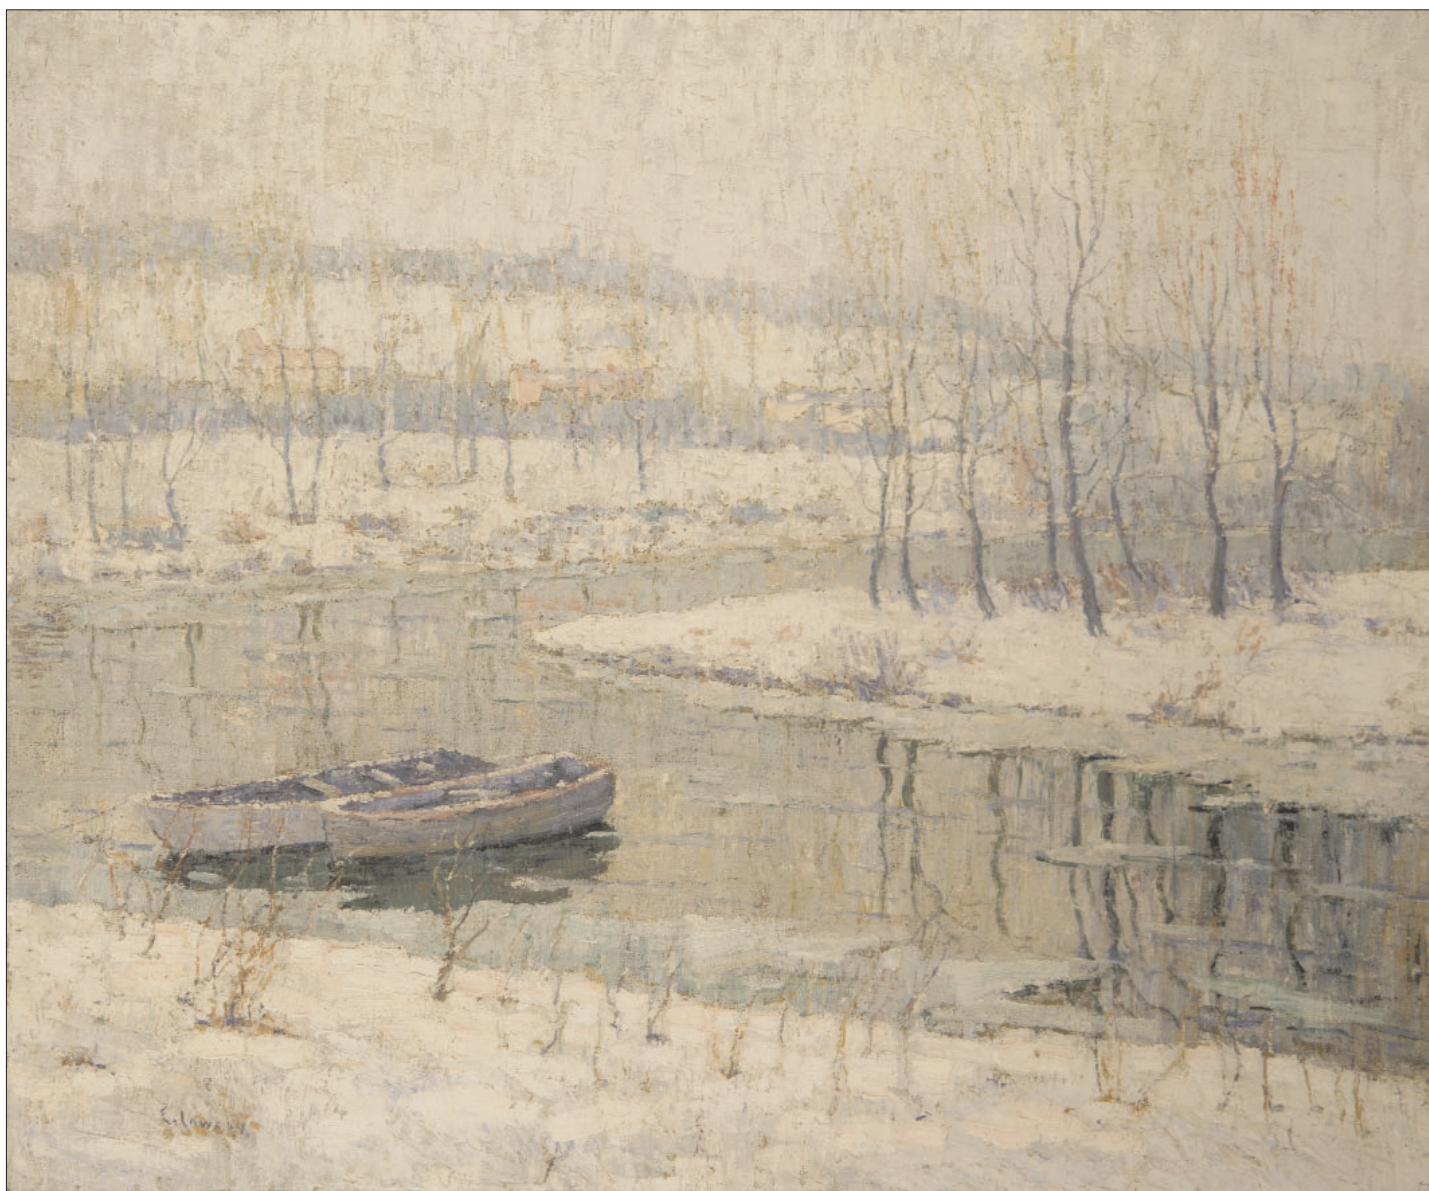

◆ Preventing Mental Illness:  
An Interdisciplinary and  
Developmental Perspective

◆ Psychiatric Diagnoses of  
Youths in the Three Years  
After a Traumatic Injury

◆ Mixed-Methods Research:  
Blending Quantitative and  
Qualitative Investigations
